# Supplementary material
Source: PubMed Central journal article supplement (PMC7417158)
Supplement: mmc1.pdf [file mmc1.pdf]

# THE LANCET

## Public Health

### **Supplementary appendix**

This appendix formed part of the original submission. We post it as supplied by the authors.

Supplement to: Pell R, Fryer E, Manek S, Winter L, Roberts ISD. Coronial autopsies identify the indirect effects of COVID-19. *Lancet Public Health* 2019; published online August 10. [https://doi.org/10.1016/S2468-2667\(20\)30180-8](https://doi.org/10.1016/S2468-2667(20)30180-8).

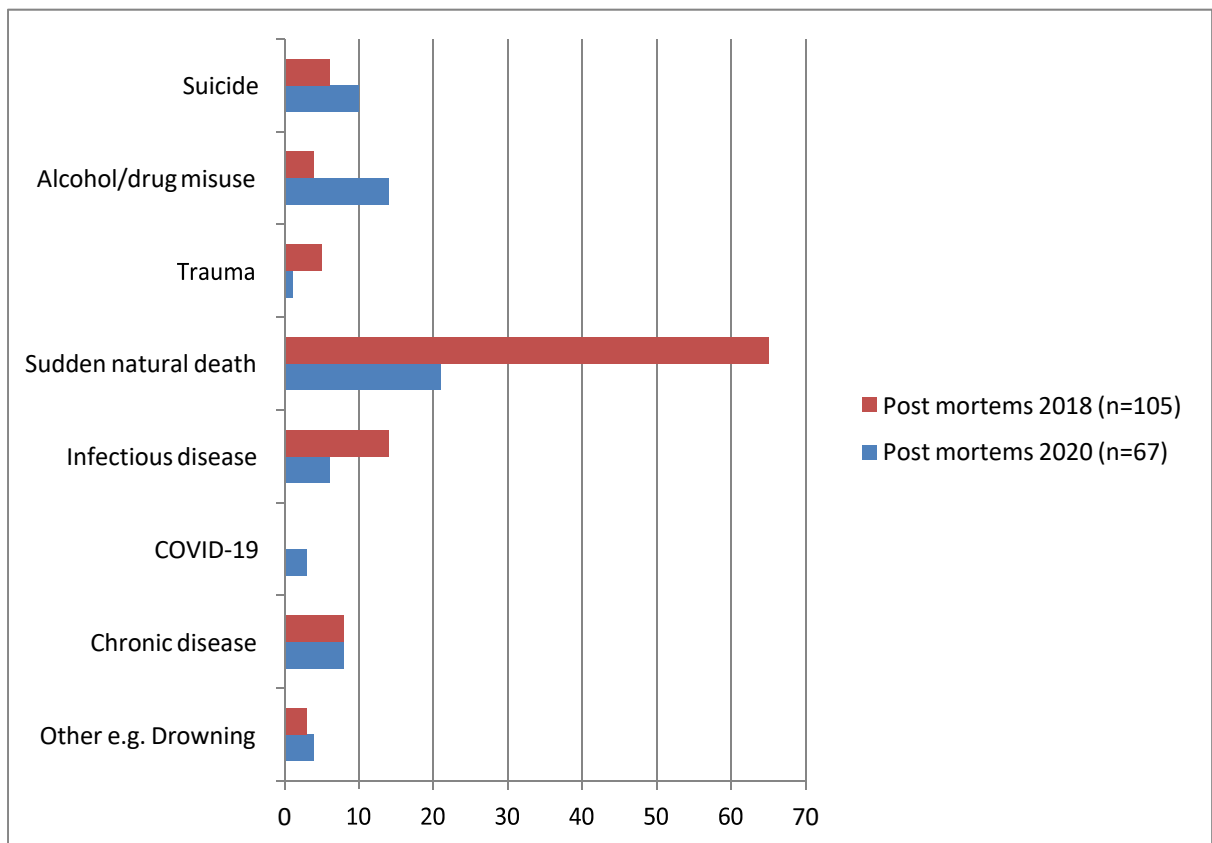

Figure: Categories of death as ascertained at post mortem examination from 23<sup>rd</sup> March to 23<sup>rd</sup> May in 2018 and 2020. A significant reduction in post mortems identifying sudden natural death ( $\chi^2(1,n=172)=15.28,p<0.0001$ ) and a significant increase in post mortems identifying suicide ( $\chi^2(1,n=172)=4.11,p=0.0426$ ) and drug / alcohol misuse ( $\chi^2(1,n=172)=12.74,p=0.0004$ ) was experienced in our caseload.
